# Supplementary material for: Regenerative, Highly-Sensitive, Non-Enzymatic Dopamine Sensor and Impact of Different Buffer Systems in Dopamine Sensing
Source: MDPI journal article supplement (doi:10.3390/bios8010009), 2018-01-24
Supplement: s1 [file s1]

# Regenerative, highly-sensitive, non-enzymatic dopamine sensor and impact of different buffer systems in dopamine sensing

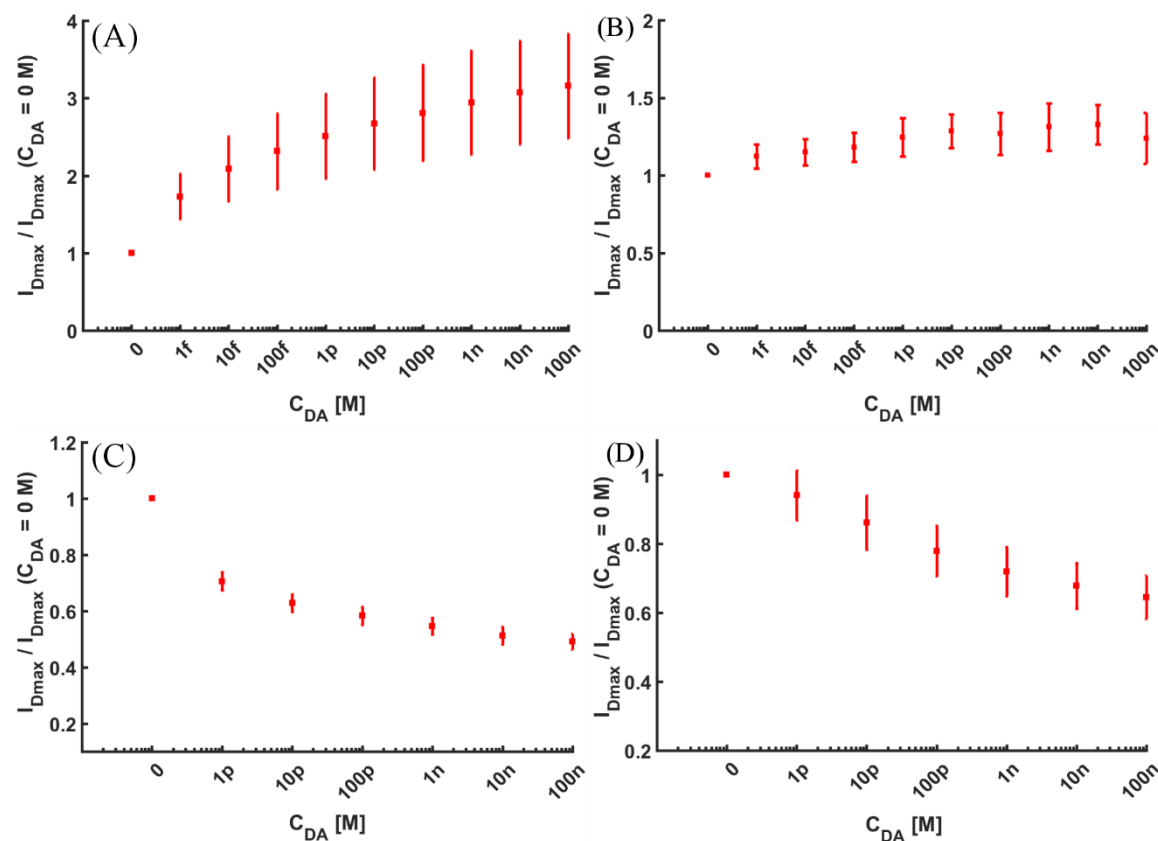

Figure S1: Statistical Analysis of dopamine sensors (each curve represents measurements of five different sensors) measured in (A) 10mM PBS(pH=7) (B) 10mM MES(pH=6.17) (C) 100mM HEPES(pH=7) (D) 50mM TRIS buffer(pH=8). ( $V_{DS}=-0.1\text{V}$  and  $V_{GS}=-0.8$ )
